# Supplementary material
Source: PubMed Central journal article supplement (PMC9372075)
Supplement: 42003_2022_3737_MOESM1_ESM.pdf [file 42003_2022_3737_MOESM1_ESM.pdf]

## Supplementary Materials for

### **Antiviral activity of natural phenolic compounds in complex at an allosteric site of SARS-CoV-2 papain-like protease**

Vasundara Srinivasan(1,\*), Hévila Brognaro(1), Prince R. Prabhu(1,2), Edmarcia Elisa de Souza(3), Sebastian Günther(4), Patrick Y. A. Reinke(4), Thomas J. Lane(2,4), Helen Ginn(5), Huijong Han(6), Wiebke Ewert(4), Janina Sprenger(4), Faisal H. M. Koua(4), Sven Falke(1,4), Nadine Werner(1), Hina Andaleeb(1,7), Najeeb Ullah(1,7), Bruno Alves Franca(1), Mengying Wang(1), Angélica Luana C Barra(1,8), Markus Perbandt(1), Martin Schwinzer(1), Christina Schmidt(6), Lea Brings(6), Kristina Lorenzen(6), Robin Schubert(6), Rafael Rahal Guaragna Machado(9), Erika Donizette Candido(9), Danielle Bruna Leal Oliveira(9,10), Edison Luiz Durigon(9,11), Stephan Niebling(12), Angelica Struve Garcia(12), Oleksandr Yefanov(4), Julia Lieske(4), Luca Gelisio(4), Martin Domaracky(4), Philipp Middendorf(4), Michael Groessler(4), Fabian Trost(4), Marina Galchenkova(4), Aida Rahmani Mashhour(4), Sofiane Saouane(13), Johanna Hakanpää(13), Markus Wolf(14), Maria Garcia Alai(12), Dusan Turk(15,16), Arwen R. Pearson(2,17), Henry N. Chapman(2,4,18), Winfried Hinrichs(19), Carsten Wrenger(3), Alke Meents(4), Christian Betzel(1,2\*).

- 1) Universität Hamburg, Department of Chemistry, Institute of Biochemistry and Molecular Biology, Laboratory for Structural Biology of Infection and Inflammation, Build. 22a, c/o DESY, 22607 Hamburg, Germany.
- 2) Hamburg Centre for Ultrafast Imaging (CUI), Universität Hamburg, Luruper Chaussee 149, 22761, Hamburg, Germany.
- 3) Department of Parasitology, Institute of Biomedical Sciences at the University of São Paulo, São Paulo, Brazil.
- 4) Center for Free-Electron Laser Science, CFEL, Deutsches Elektronen Synchrotron DESY, Notkestrasse 85, 22607 Hamburg, Germany.
- 5) Diamond Light Source Ltd. Diamond House, Harwell Science and Innovation Campus, Didcot, OX11 0DE, UK.
- 6) European XFEL GmbH. Holzkoppel 4, 22869 Schenefeld, Germany.
- 7) Department of Biochemistry, Bahauddin Zakariya University Multan-60800, Punjab, Pakistan.
- 8) Pólo TerRa, São Carlos Institute of Physics, University of São Paulo, São Carlos, Brazil.

- 45 9) Department of Microbiology, Institute of Biomedical Sciences at the University  
46 of São Paulo, São Paulo, Brazil.  
47  
48 10) Clinical Laboratory, Hospital Israelita Albert Einstein, São Paulo, Brazil.  
49  
50 11) Scientific Platform Pasteur USP, São Paulo, Brazil.  
51  
52 12) European Molecular Biology Laboratory Hamburg, c/o DESY, Notkestrasse 85,  
53 22607 Hamburg. Germany.  
54  
55 13) Photon Science, Deutsches Elektronen Synchrotron (DESY), Notkestrasse 85,  
56 22607, Hamburg, Germany.  
57  
58 14) Fraunhofer Institute for Translational Medicine and Pharmacology (ITMP),  
59 Schnackenburgallee 114, 22525 Hamburg, Germany.  
60  
61 15) Department of Biochemistry & Molecular & Structural Biology, Jozef Stefan  
62 Institute, Jamova 39, 1 000 Ljubljana, Slovenia.  
63  
64 16) Centre of excellence for Integrated Approaches in Chemistry and Biology of  
65 Proteins (CIPKEBIP), Jamova 39, 1 000 Ljubljana, Slovenia.  
66  
67 17) Universität Hamburg, Institut für Nanostruktur- und Festkörperphysik, Luruper  
68 Chaussee 149, 22761, Hamburg, Germany.  
69  
70 18) Department of Physics, Universität Hamburg, Luruper Chaussee 149, 22761,  
71 Hamburg, Germany.  
72  
73 19) Universität Greifswald, Institute of Biochemistry, Felix-Hausdorff-Str. 4, 17489  
74 Greifswald, Germany.  
75  
76  
77

78 Correspondence to: [vasundara.srinivasan@chemie.uni-hamburg.de](mailto:vasundara.srinivasan@chemie.uni-hamburg.de), [christian.betzel@uni-hamburg.de](mailto:christian.betzel@uni-hamburg.de)  
79

80  
81 **This PDF file includes:**

82  
83 Supplementary Notes  
84 Figures. S1 to S16  
85  
86  
87  
88  
89

90

91 **Supplementary Note 1**

92 **Extraction, Isolation and Purification of p-hydroxy-benzaldehyde (HBA)**

93

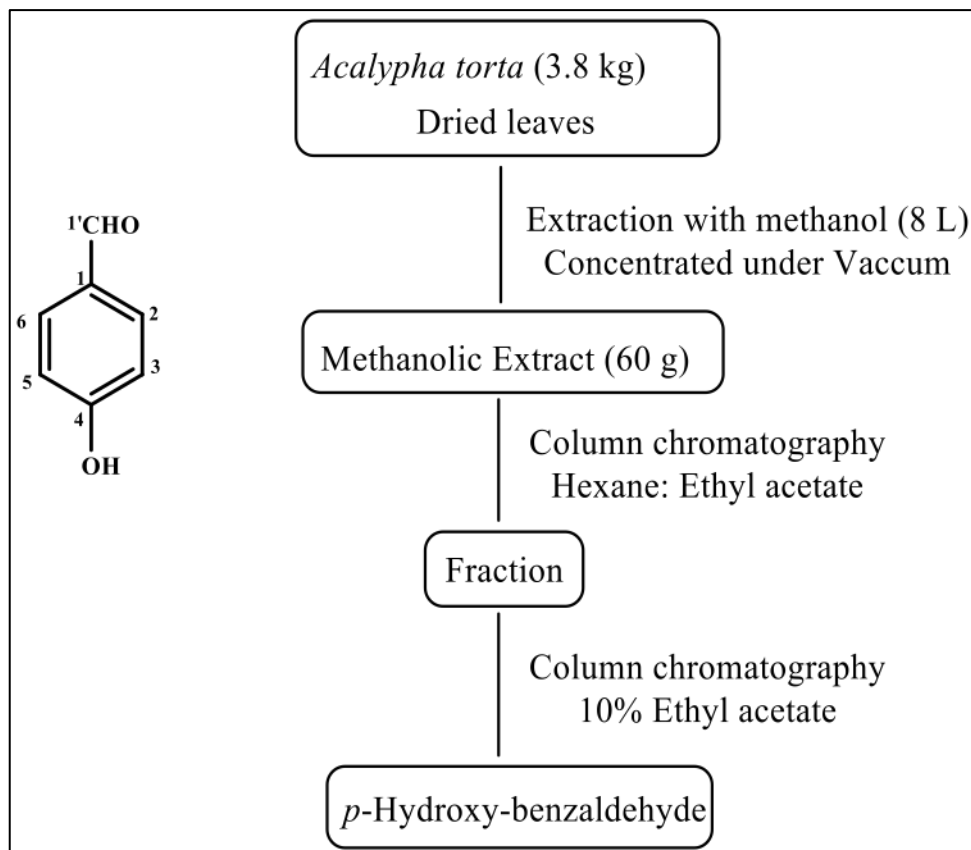

94

95

96 Leaves of *Acalypha torta* were collected from the flower Kingdom in Ibada, Oyo State, Nigeria.

97 The compound p-hydroxy-benzaldehyde (HBA) was extracted, isolated and purified following

98 the scheme above. The compound was analyzed by Electron Ionization Mass Spectrometry (EI-

99 MS) that showed a peak with m/z 122, with a fragmentation pattern at m/z 121, 97, 95, 81, 69,

100 and 55. The NMR spectrum is shown below. The MS and NMR spectra of HBA corresponds to

101 the data published before<sup>1</sup>.

102

103  
104  
105  
106

Figure S1. NMR spectra of p-Hydroxy-benzaldehyde (HBA)

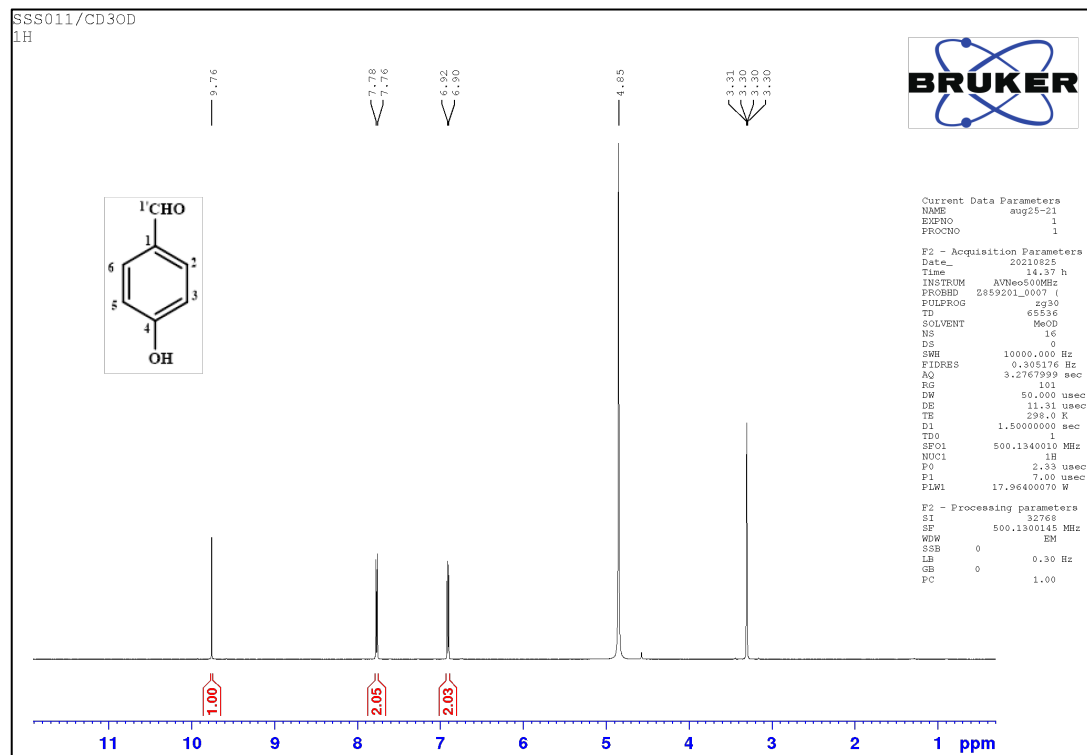

107  
108

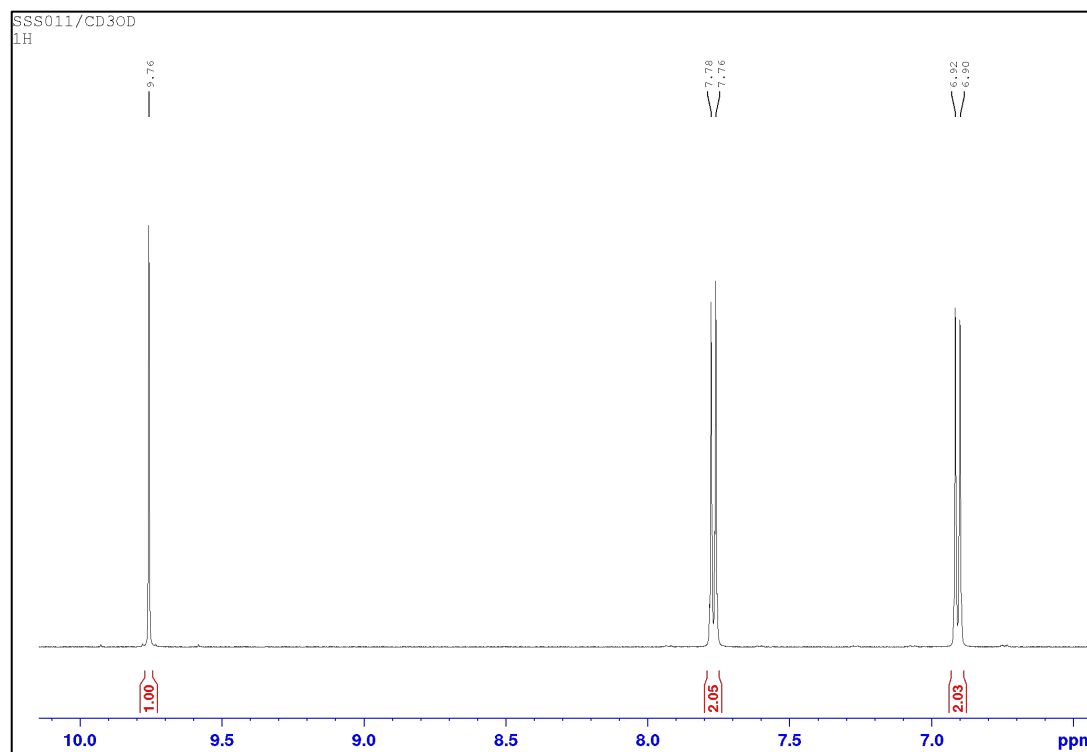

109



110  
111  
112  
113  
114

## Supplementary Note 2

### Extraction, Isolation and Purification of 4-(2-Hydroxyethyl) Phenol (YRL)

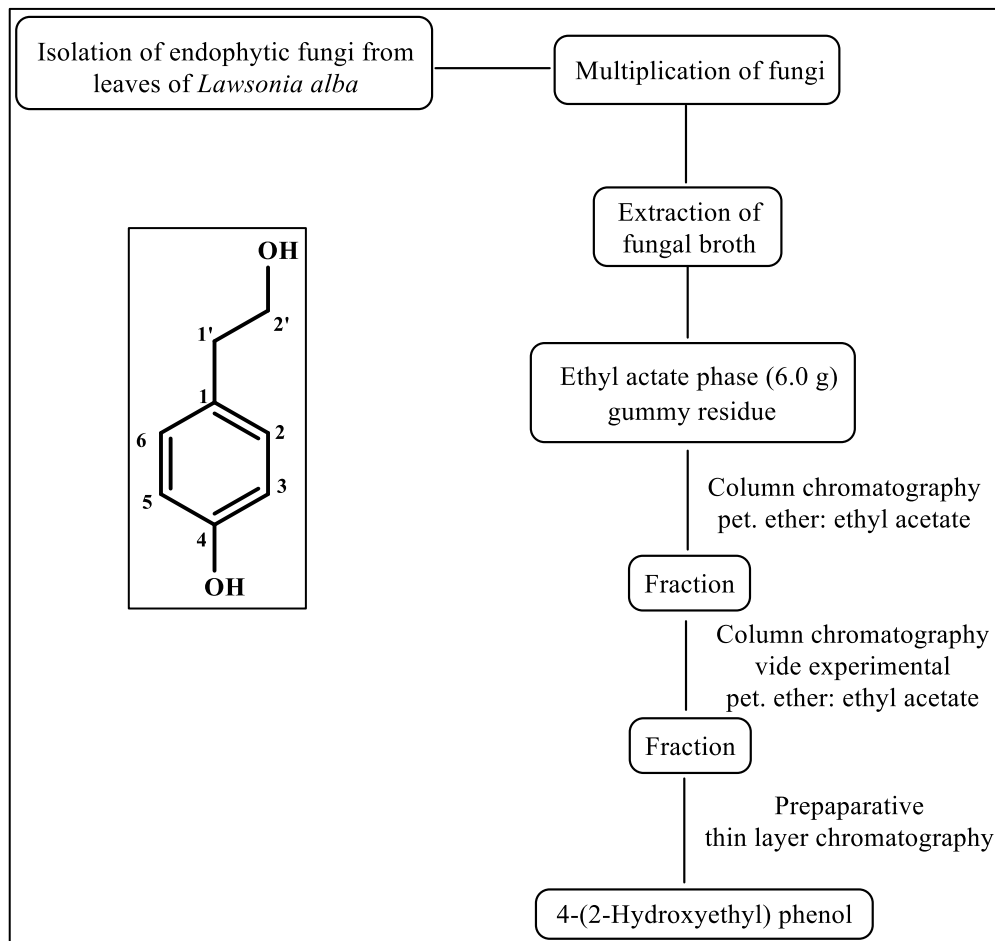

115  
116

117 Endophytic fungi from leaves of *Lawsonia alba* were collected at ICCBS, University of Karachi,  
118 Karachi, Pakistan. Extraction, isolation and purification of 4-(2-hydroxyethyl) phenol (YRL) is  
119 shown in the scheme above. The compound YRL was analyzed by mass spectrometry that  
120 showed a peak at  $m/z$  corresponding to a mass of 138.07 Da. The NMR spectrum is shown  
121 below. Spectral data obtained for the compound were identical to previously reported data<sup>2</sup>.

122  
123  
124  
125  
126  
127  
128

129  
130

Figure S2. NMR spectra of 4-(2-Hydroxyethyl) Phenol (YRL)

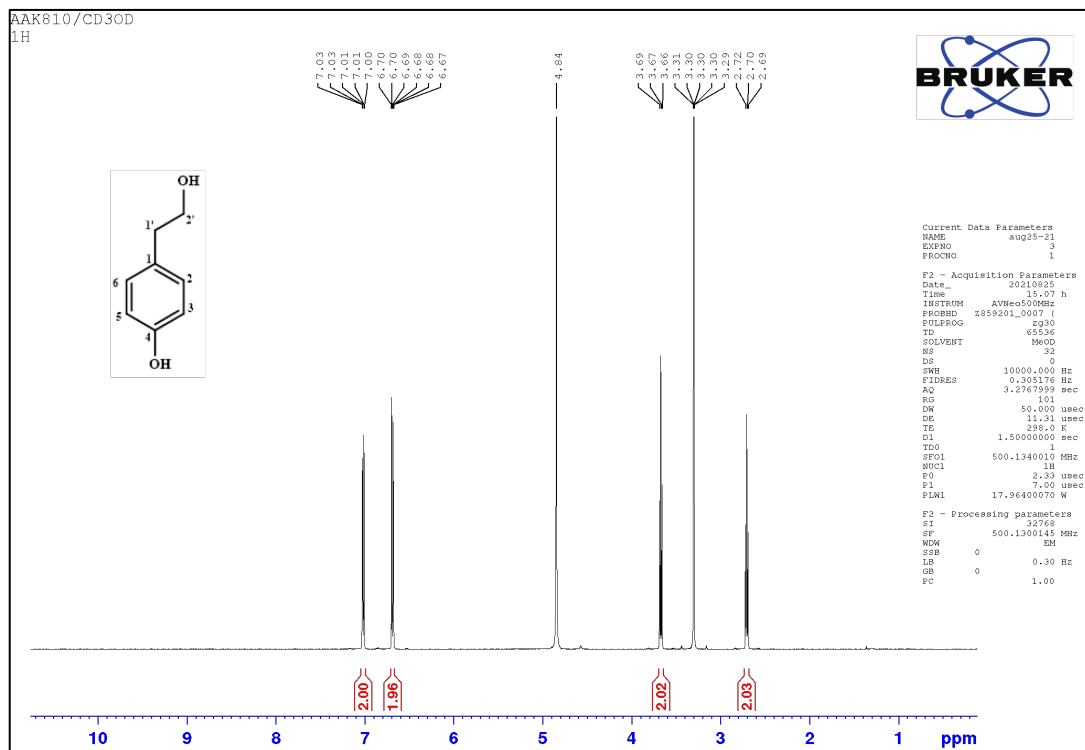

131  
132

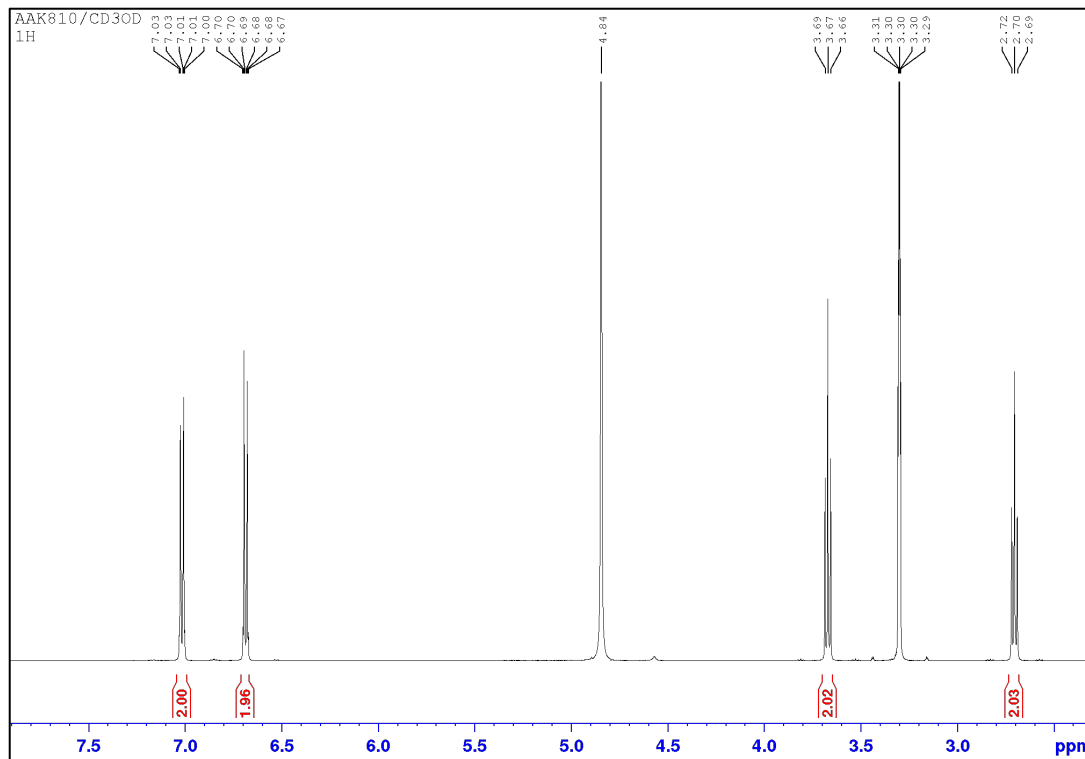

133  
134  
135

136 **Supplementary Note 3**

137

138 **Extraction, Isolation and Purification of Methyl-3,4-dihydroxybenzoate (HE9)**

139

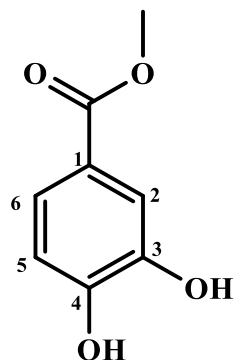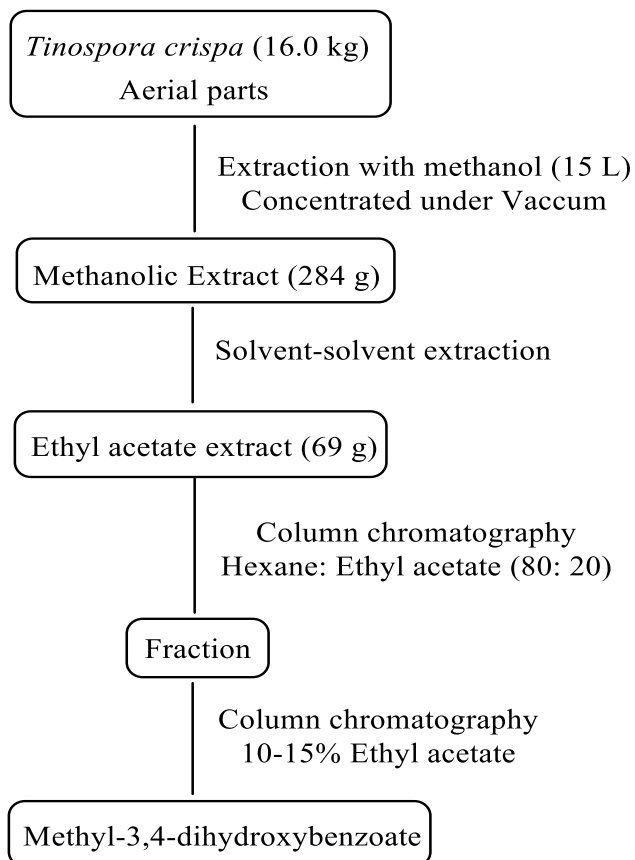

140

141

142

143 Aerial parts of *Tinospora crispa* Meirs were collected from the herbal gardens of the Laboratory  
144 of Natural Products, University of Putra, Malaysia. Extraction, isolation and purification of  
145 methyl-3,4-dihydroxybenzoate (HE9) is shown in the scheme above. The compound HE9 was  
146 analyzed by mass spectrometry that showed a peak at  $m/z$  corresponding to 168.04 Da. The  
147 NMR spectrum is shown below. The spectra are in agreement to previously reported data of the  
148 same compound isolated from *Schisandra verruculosa*<sup>3</sup>.

149

150

151  
152

Figure S3. NMR spectra of Methyl-3,4-dihydroxybenzoate (HE9)

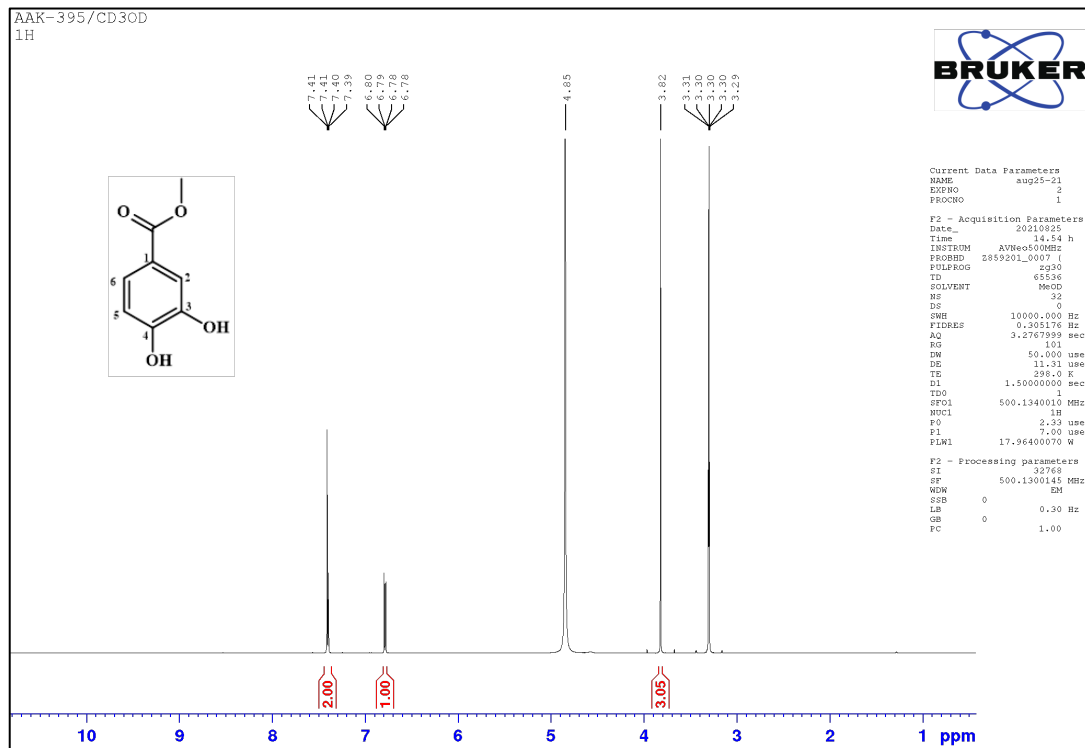

153  
154  
155  
156

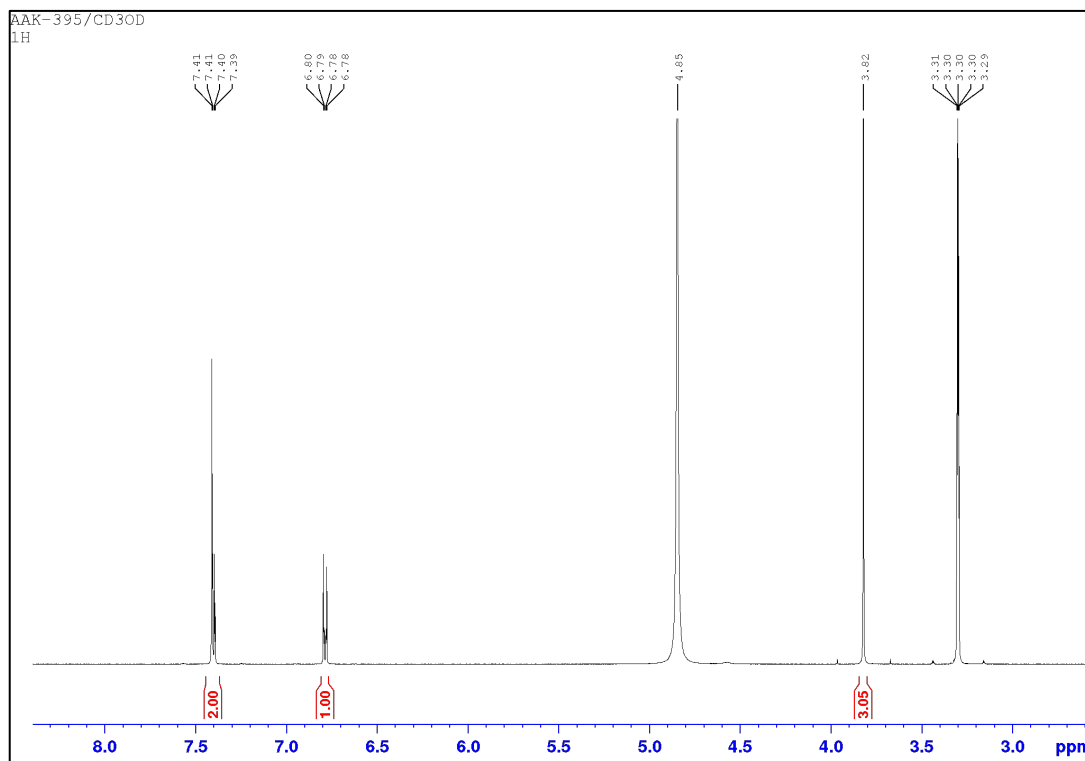

157  
158

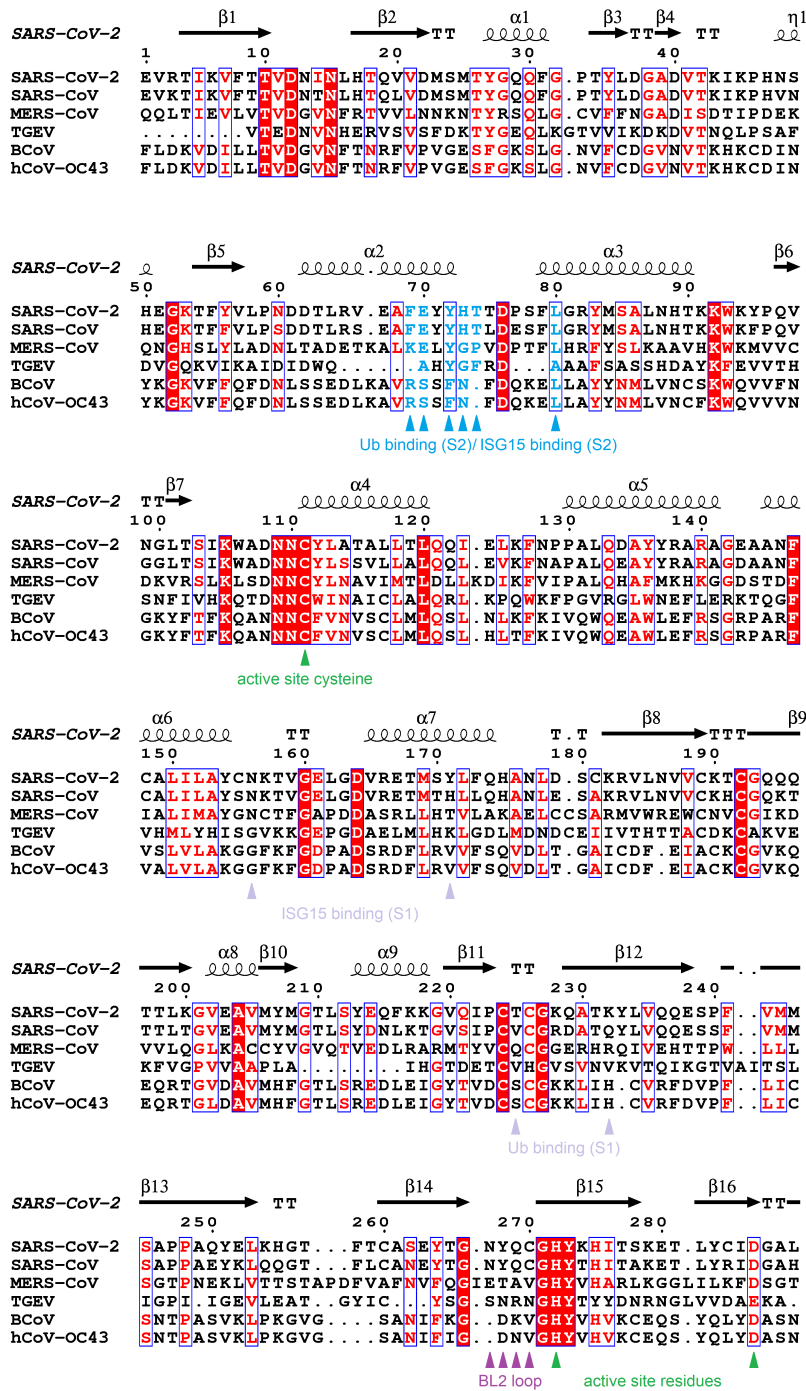

159  
 160  
 161  
 162  
 163  
 164  
 165  
 166  
 167

**Figure S4.**

**Sequence alignment of PLpro domains from selected  $\alpha$ -,  $\beta$ - and related  $\gamma$ - coronaviruses**

Sequences of PLpro from SARS-CoV-2, ID: P0DTC1; SARS-CoV, ID: P0C6X7; MERS-CoV (Middle East Respiratory Syndrome Coronavirus), ID: K9N638; TGEV (Transmissible Gastroenteritis Virus), ID: P0C6V2; BCoV (Bovine Coronavirus), ID: P0C6W7; hCoV-OC43 (Human Coronavirus OC43), ID: P0C6X6 are aligned using Esprict 3<sup>4</sup>. The secondary structure and sequence numbering based on our crystal structure of PLpro (PDB code 7NFV) is depicted on the top of the alignment. Active site residues are indicated in green triangles, the blocking

168 loop in purple, the ISG15 binding S1 site in dark red and the ISG15 S2 allosteric binding site  
169 overlapping with the inhibitor binding site is shown in light blue.  
170

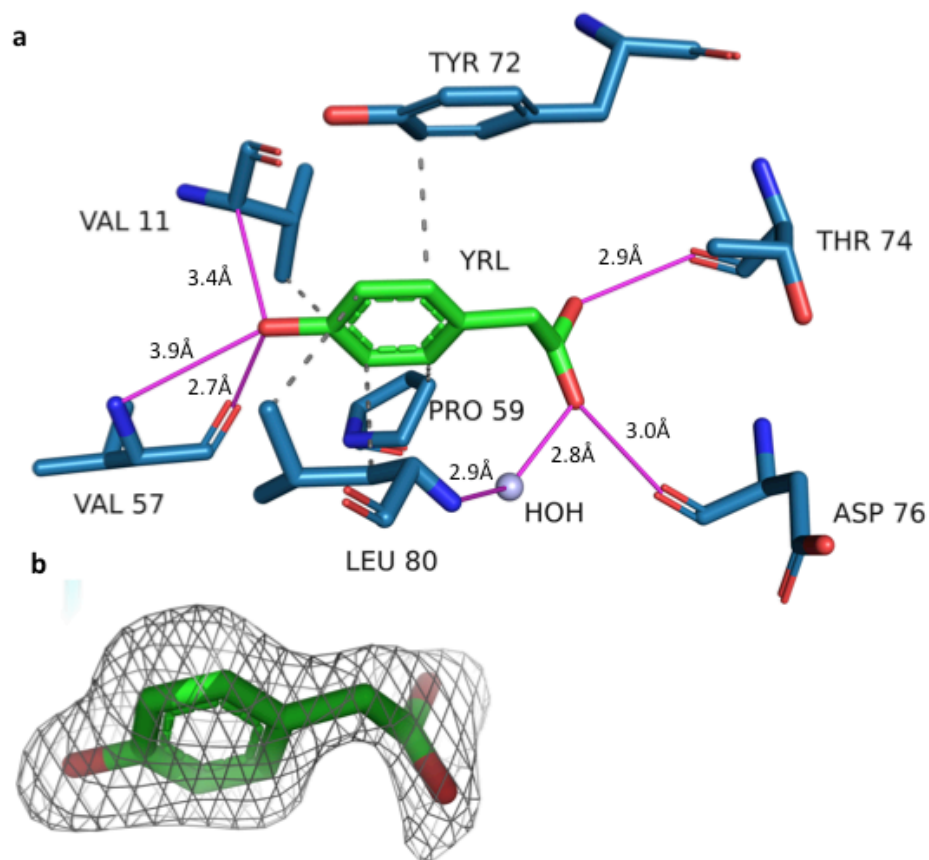

171  
172

173 **Figure S5.**

174 **Interaction network of the three compounds in PLpro complex structures**

175 a. YRL

176 a. YRL interactions with PLpro are mediated by hydrogen bonds of the phenolic  
177 hydroxyl to amino acid residues Val 11 and Val 57. The aliphatic hydroxyl substituent of  
178 YRL has an alternate conformation with equal occupancy in the complex. Both  
179 conformations are stabilized by hydrogen bonds to backbone carbonyl oxygens of Thr 74  
180 and Asp 76. Hydrophobic interactions (black dashed line) with Val 11, Pro 59, Tyr 72  
181 and Leu 80 complete the interaction network. YRL is represented as green sticks and the  
182 amino acid residues in blue sticks.

183

184 b. Fo-Fc electron density map contoured at a sigma level 3.0 for YRL

185

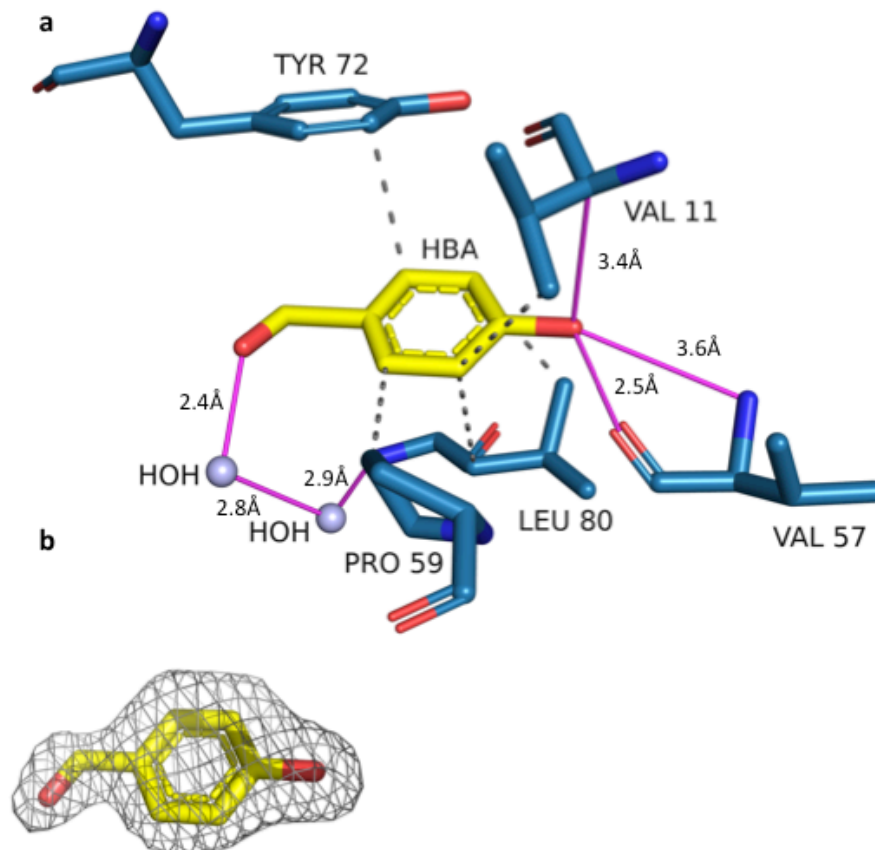

187

188 **Figure S6.**189 **Interaction network of the three compounds in PLpro complex structures**

190 a. HBA binds in a hydrophobic cavity with interactions to Val 11, Pro 59, Tyr 72 and Leu  
 191 80. The binding pattern is similar to that of YRL, including the hydrogen bond to Val 57.  
 192 HBA is represented as yellow sticks and the amino acid residues in blue sticks.

193

194 b. Fo-Fc electron density map contoured at a sigma level 3.0 for HBA.

195

196



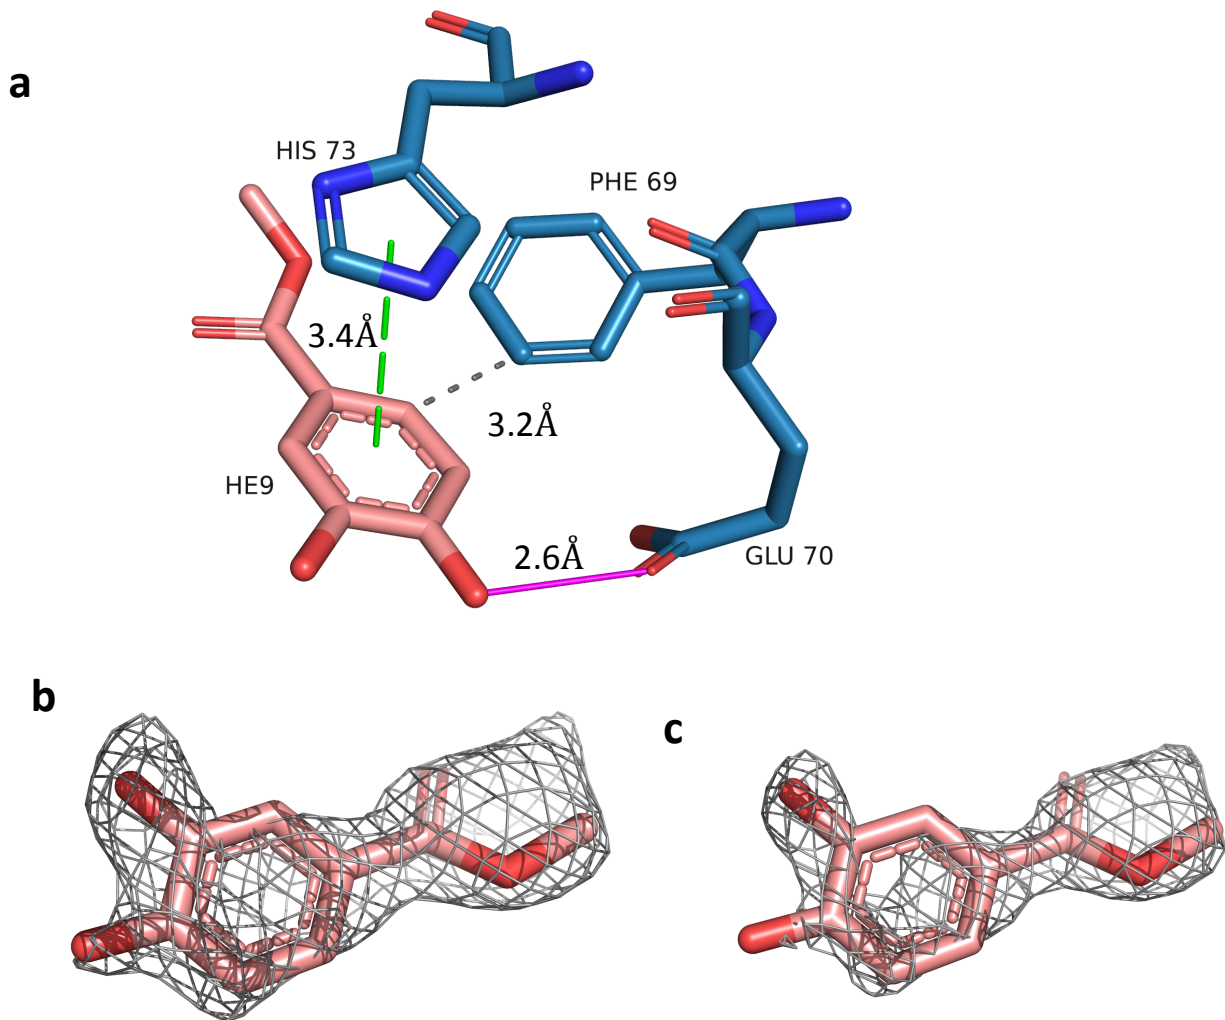

197  
198  
199  
200  
201  
202  
203  
204  
205  
206  
207  
208

**Figure S7.**

**Interaction network of the three compounds in PLpro complex structures**

a. HE9 binding to PLpro is mediated by hydrophobic interaction with Phe 69 and  $\pi$ -stacking (green dashed line) with His 73. A hydrogen bond with the side chain of Glu 70 completes the interaction network of HE9 to PLpro. HE9 is represented as pink sticks and the amino acid residues in blue sticks.

b. Fo-Fc electron density map contoured at a sigma level 2.5 for HE9.

c. Fo-Fc electron density map contoured at a sigma level 3.0 for HE9.

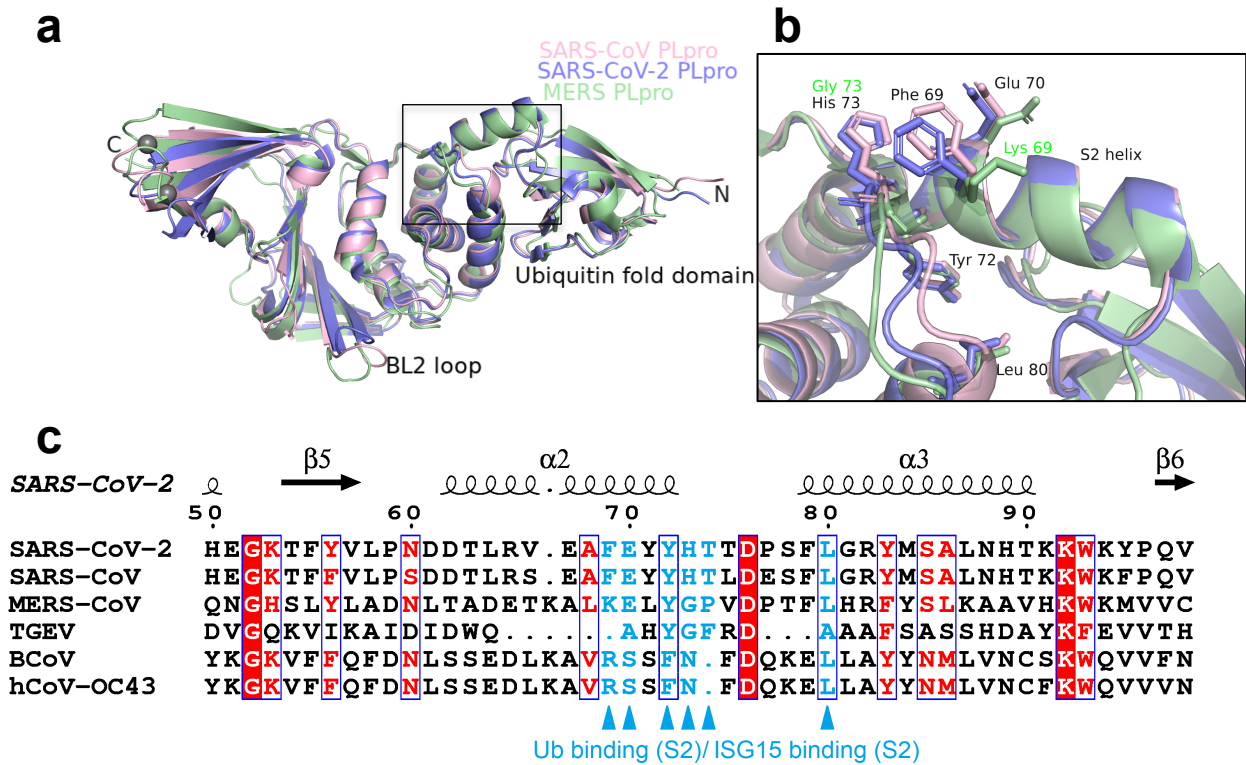

**Figure S8.**  
**Comparison of the ISG15-S2 allosteric binding site in SARS-CoV, SARS-CoV-2 and MERS-CoV PLpro**

a. Superposition of the crystal structures of SARS-CoV PLpro (PDB: 2FE8 in light pink), SARS-CoV-2 PLpro (PDB: 7NFV in slate blue) and MERS-CoV PLpro (PDB: 4RNA in light green). The zinc fingers domain, ubiquitin-fold domain and the blocking loop 2 (BL2) are the most variable regions among the three PLpro structures.

b. The S2 binding ISG15 site in PLpro consisting of residues Phe 69, Glu 70, Tyr 72, His 73 and Leu 80 is conserved between SARS-CoV and SARS-CoV-2.

c. The sequence alignment for the region corresponding to the S2 ISG15 binding site shows that the MERS-CoV differs in critical binding residues; Phe 69 in SARS-CoV-2 PLpro is replaced by a lysine residue (F69K), Tyr 72 to a leucine residue (Y72L) and His 73 to a glycine residue (H73G).

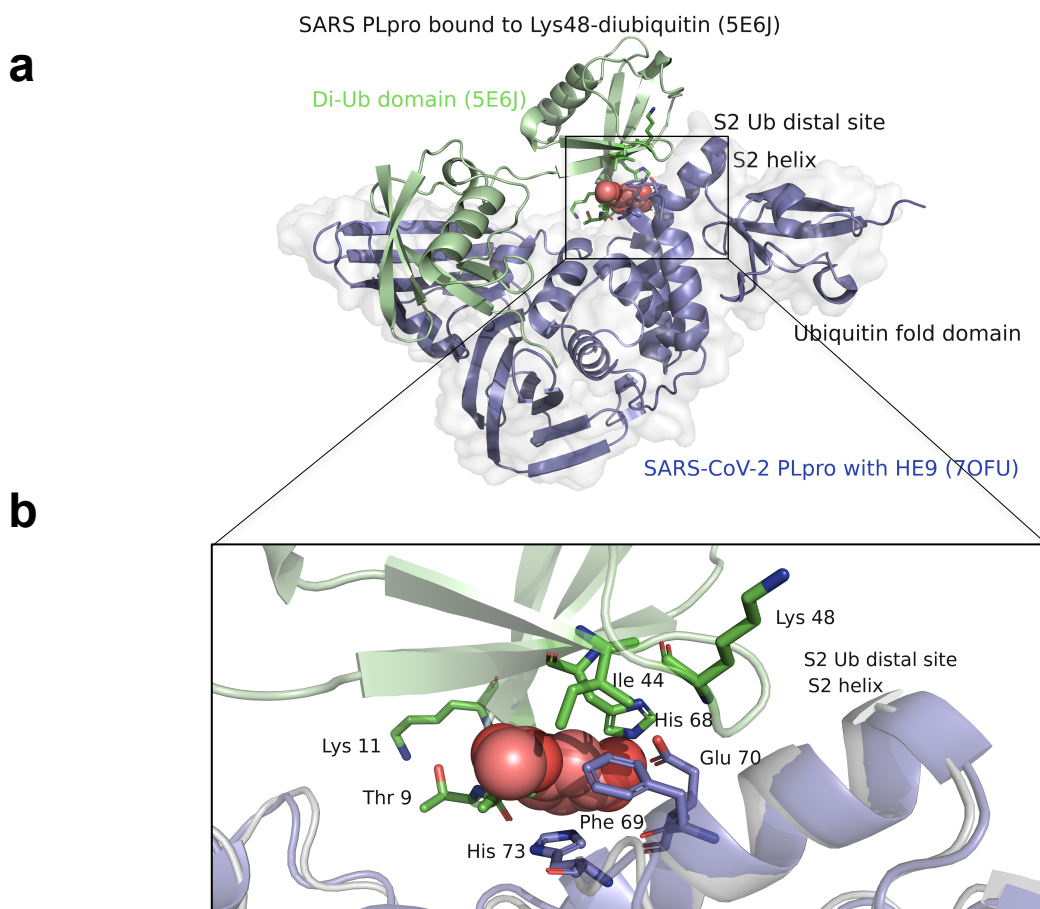

227

228

229

**Figure S9.**

230 **The binding of the three natural compounds disrupts interaction of the K48-linked di-**  
 231 **ubiquitin molecule to PLpro**

232

233 a. Superposition of the crystal structures of SARS-CoV PLpro complex with Lys48 linked  
 234 di-Ub (PDB code 5E6J, PLpro in grey, di-Ubiquitin domain in green) with SARS-CoV-2  
 235 PLpro+HE9 (PDB code 7OFU, in slate blue). The natural compound (HE9) is represented  
 236 with red spheres.

237

238 b. Close-up view of the S2-Ub binding site. The di-ubiquitin molecule is shown in green  
 239 cartoon representation with the interacting residues Lys 11, Ile 44 and Lys 48 shown in  
 240 sticks. The bound inhibitor compound HE9 (red spheres) clearly prevents the binding of the  
 241 di-ubiquitin molecule in the S2 binding site of PLpro.

242

243  
244

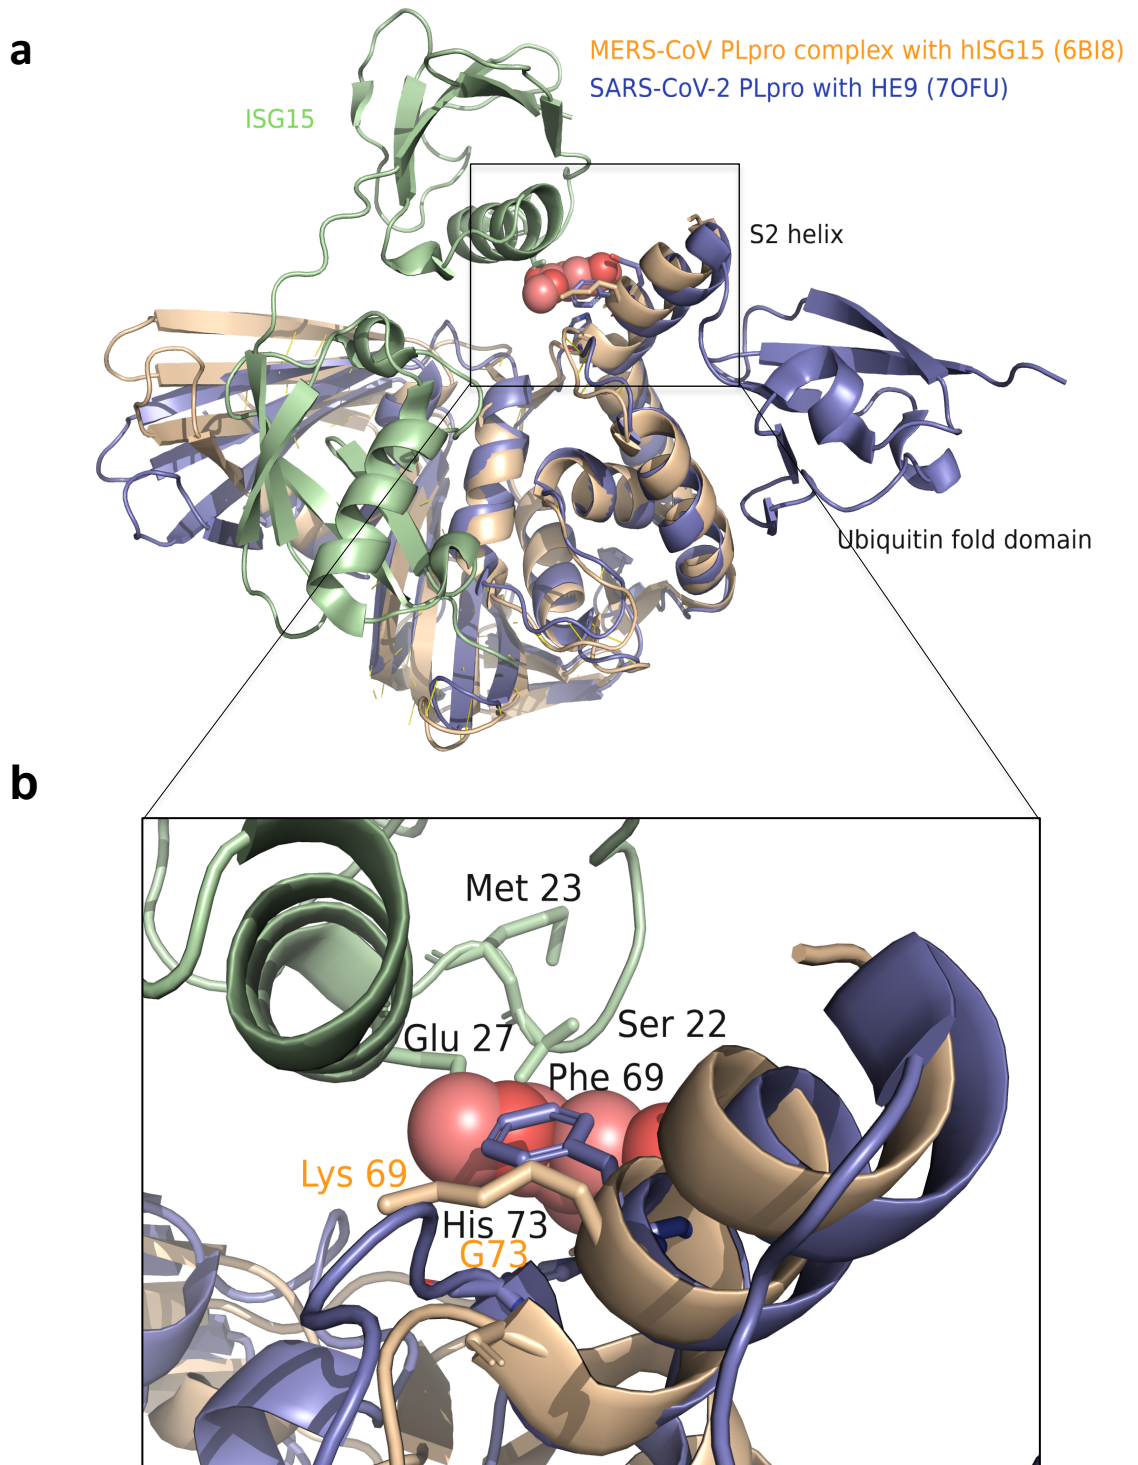

245  
246  
247  
248

**Figure S10.**  
**The binding of HE9 prevents interaction of the ISG15 molecule in MERS-Co-V PLpro**

- 249 a. Superposition of the crystal structures of MERS-CoV PLpro complex with ISG15  
250 (PDB code 6BI8, PLpro in wheat, ISG15 molecule in green) with SARS-Cov-2  
251 PLpro+HE9 (PDB code 7OFU, in slate blue). The natural compound (HE9) is  
252 represented as spheres.  
253
- 254 b. Close-up view of the S2-Ub binding site. The ISG15 molecule is shown in green  
255 cartoon representation with the interacting residues Ser 22, Met 23 and Glu 27 shown  
256 in sticks. The bound inhibitor compound HE9 (red spheres) clearly blocks the binding  
257 of the ISG15 molecule to the S2 binding site of MERS-CoV PLpro. The Phe 69 to Lys  
258 and His 73 to Gly change contribute to the regional different surface charge properties  
259 of MERS-CoV PLpro.  
260

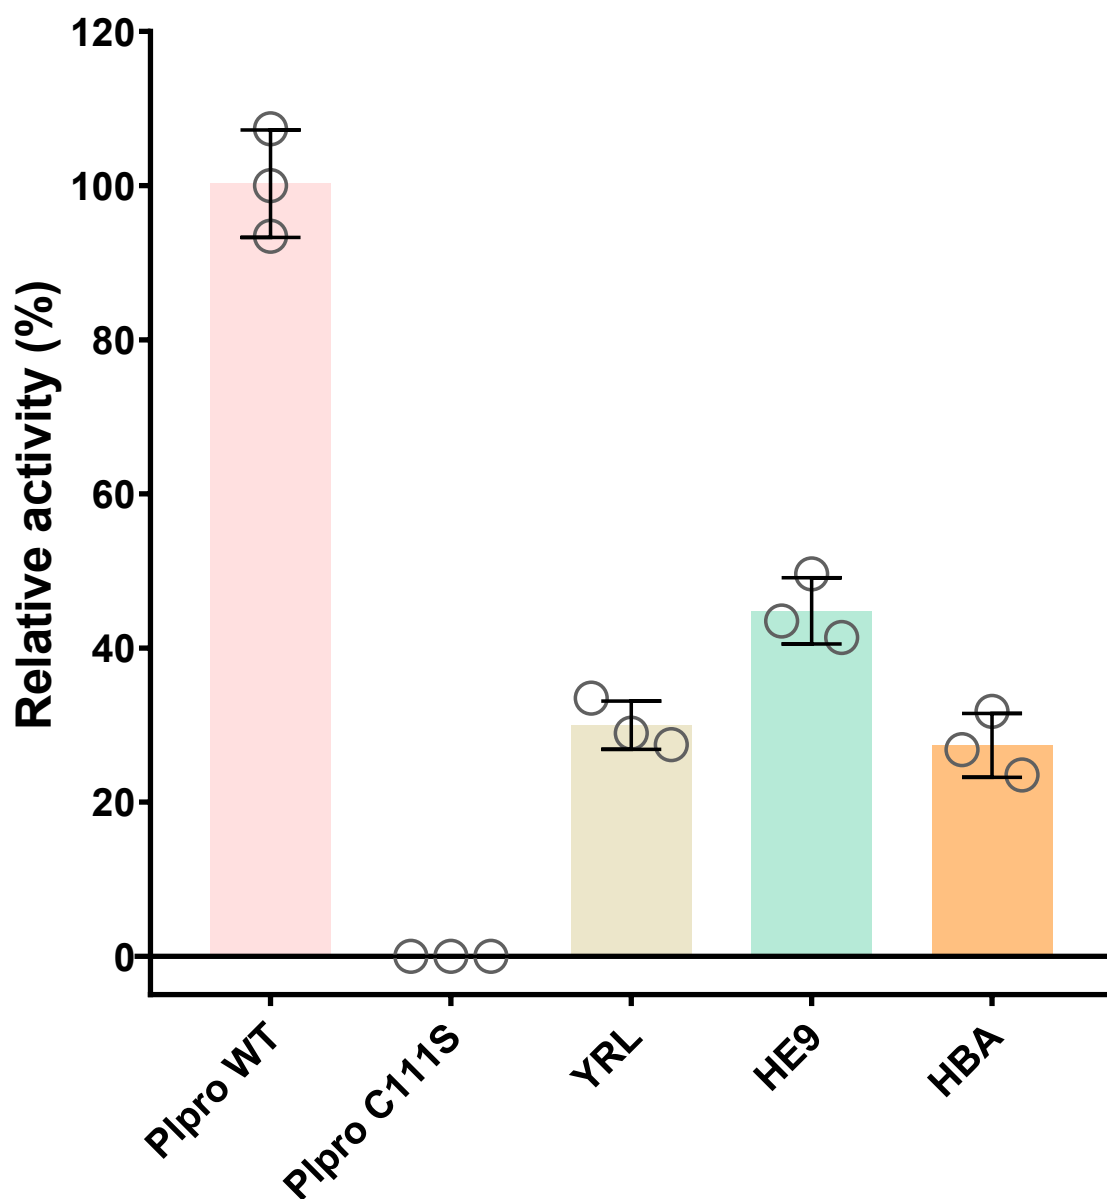

261  
 262 **Figure S11.**  
 263 **Inhibition of PLpro by the three natural compounds in deISGylation assay with ISG15-Rh**  
 264 **substrate and comparison with catalytically inactive PLpro mutant (C111S)**

265  
 266 Wild type PLpro (WT PLpro) at 10nM concentration represents 100% of deISGylation  
 267 activity and the three natural compounds YRL, HBA and HE9 at 50  $\mu$ M show clear  
 268 inhibition of PLpro enzymatic activity. As experimental control, catalytically inactive  
 269 PLpro mutant C111S at 10nM concentration was used. ISG15-Rh at a concentration of  
 270 100nM was used as the substrate. Measured fluorescence values were blank corrected  
 271 with buffer containing substrate and were measured in triplicates over 60 min with one  
 272 read per minute.

273

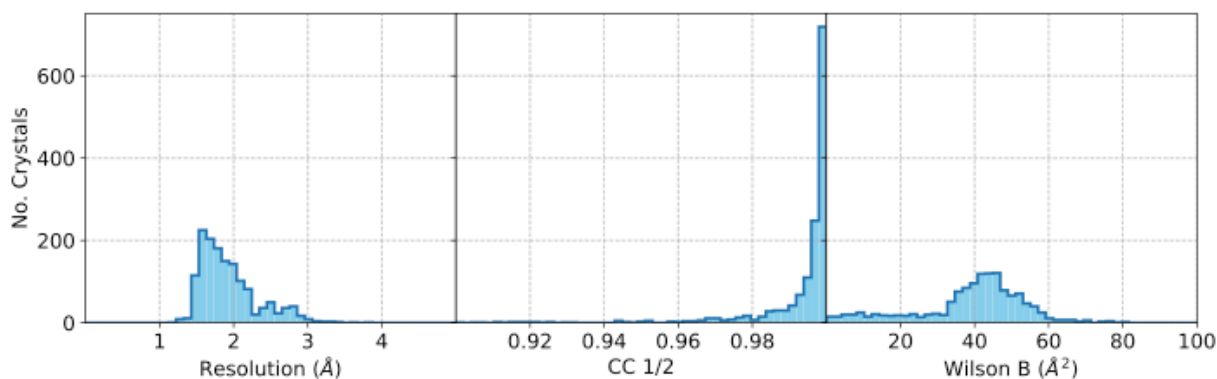

274  
 275 **Figure S12:**  
 276 **Data quality indicators of the diffraction datasets by X-ray screening of a library of 500**  
 277 **natural compounds**

278  
 279 Approximately 2000 crystals of PLpro co-crystallized with the library of 500 compounds  
 280 were harvested for data collection. More than one dataset per compound was collected  
 281 that resulted in about 2500 datasets. A total of 1469 datasets were processed with the  
 282 previously established automatic pipeline<sup>5</sup>. Data quality indicators, resolution (left), CC<sub>1/2</sub>  
 283 (middle) and Wilson B-factor (right) are shown.  
 284



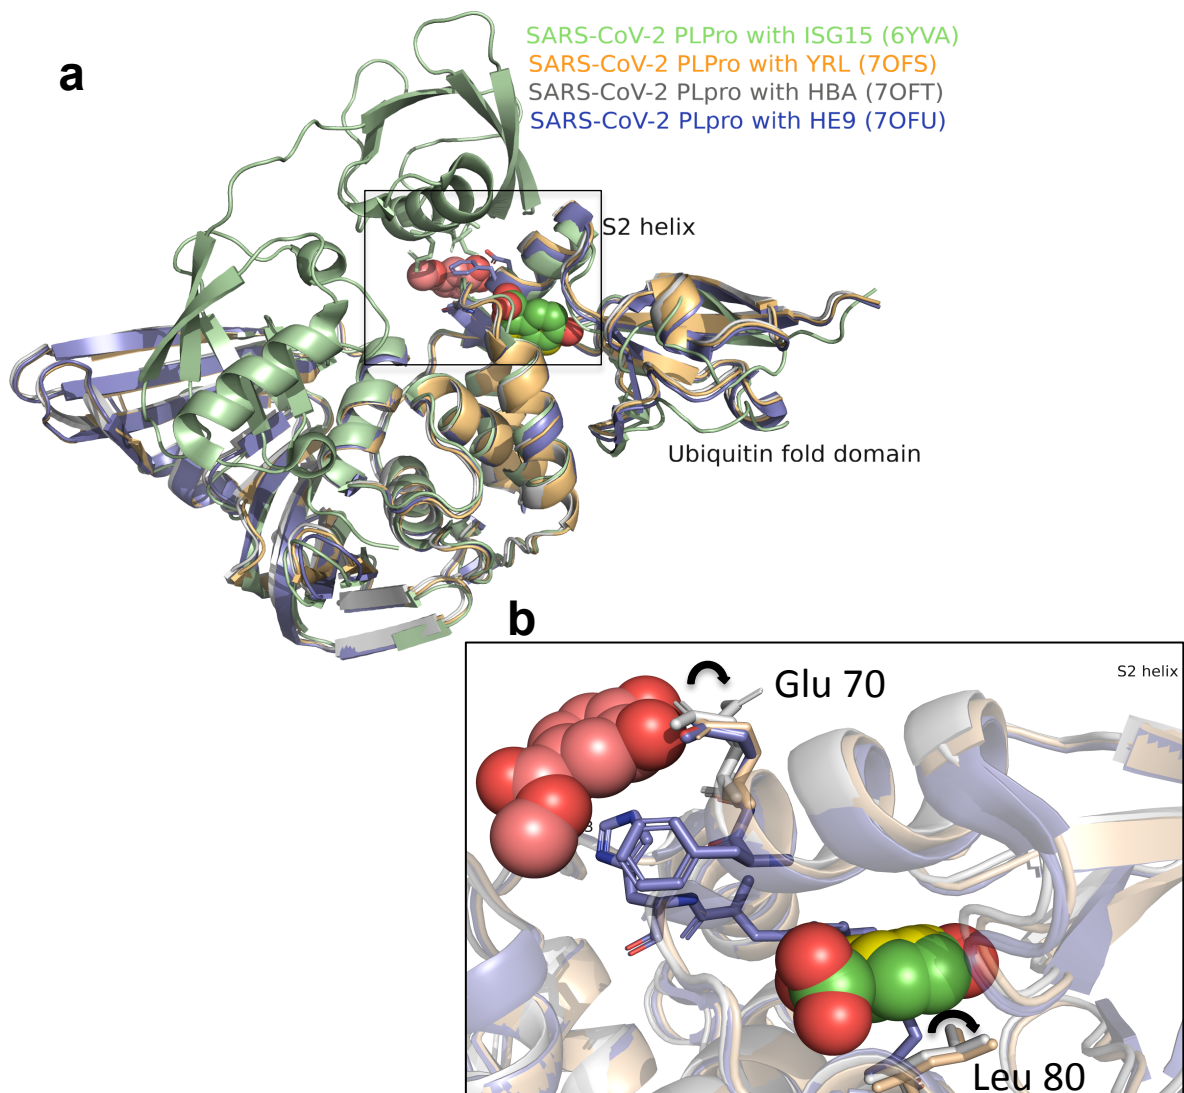

285  
 286  
 287  
 288  
 289  
 290  
 291  
 292  
 293  
 294  
 295  
 296  
 297  
 298  
 299  
 300  
 301

**Figure S13.**

**Conformational changes in PLpro by the binding of the inhibitor compounds**

- a. Superposition of the crystal structures of SARS-CoV-2 PLpro-C111S in complex with mouse-ISG15 (PDB code 6YVA, in light green) with SARS-CoV-2 PLpro+YRL (PDB code 7OFS, in light orange), SARS-CoV-2 PLpro+HBA (PDB code 7OFT, in grey) and SARS-CoV-2 PLpro+HE9 (PDB code 7OFU, in slate blue). It can be clearly seen that the Ubiquitin-fold domain and the BL2 loop regions are the most dynamic regions in the PLpro molecule.
- b. Close-up view of the ISG15 binding site. The residue Leu 80 (sticks in slate blue, apo structure) has to rotate in the complex structures to accommodate the inhibitor molecule. Glu 70 adopts a different side chain conformation when 4-hydroxybenzaldehyde (HBA) interacts with PLpro.



302  
303  
304  
305

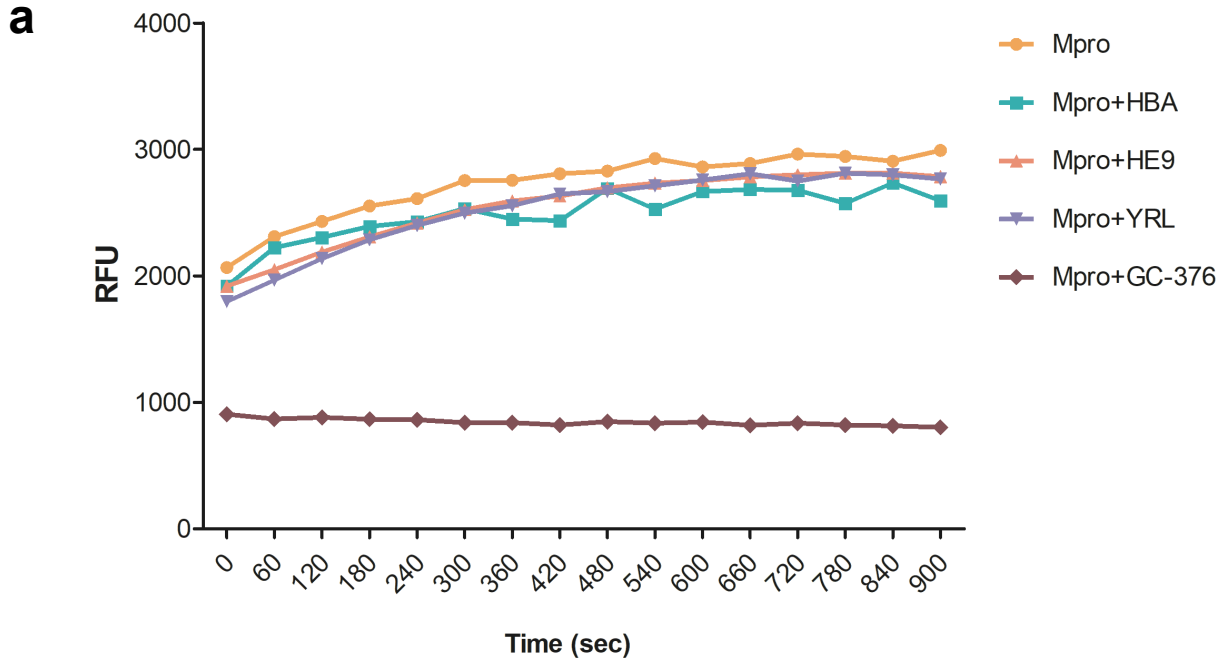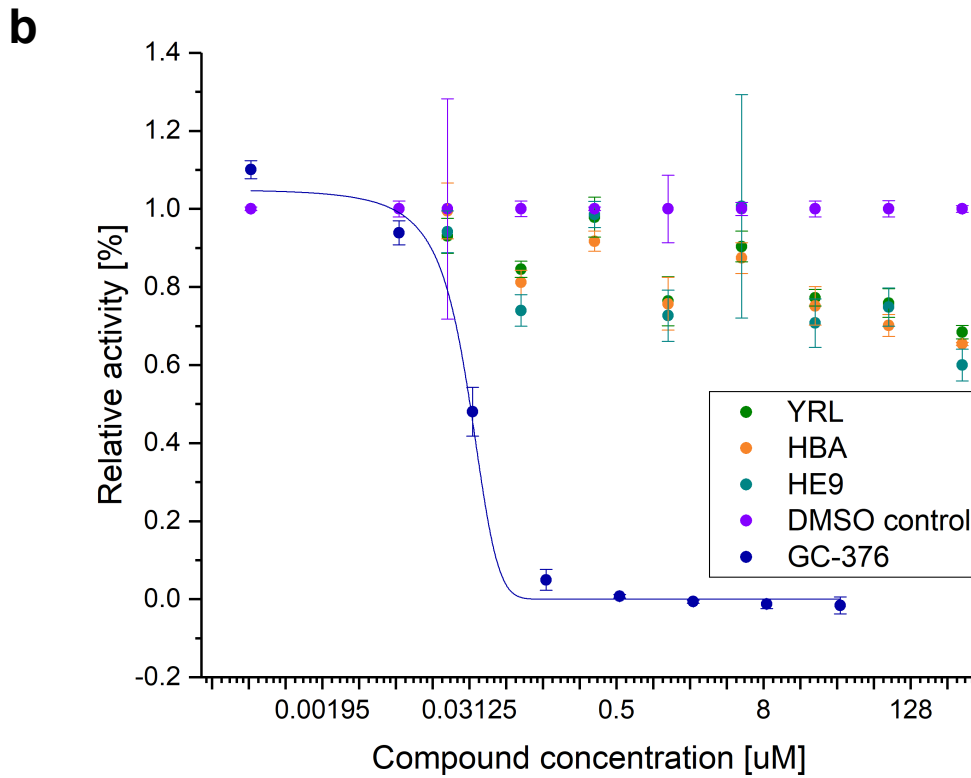

306

307 **Figure S14.**

308 **a.** Inhibition assay experiment of the SARS-CoV-2 Main protease (Mpro) applying  
309 the three natural compounds in a FRET based activity assay and utilizing 2-  
310 AbzSAVLQSGTyr(3-NO<sub>2</sub>)R-OH as substrate. The compounds were incubated  
311 with Mpro for 6h at 10°C and fluorescence was measured for 15 min with read-  
312 out time of 1 min. The known inhibitor GC-376 was used as the positive control.

313  
314 **b.** IC<sub>50</sub> determination was performed with 2-AbzSAVLQSGTyr(3-NO<sub>2</sub>)R-OH as  
315 the substrate. A gradient concentration of all three compounds YRL, HBA, HE9,  
316 a negative DMSO control, and the known inhibitor GC-376 as positive control, in  
317 a concentration range from micromolar to nanomolar values. The compounds  
318 were incubated with the Mpro for 30 minutes. The IC<sub>50</sub> values were calculated by  
319 the dose-response-inhibition function after the normalization of the enzymatic  
320 activity values with the negative control. The IC<sub>50</sub> value for the control  
321 compound GC-376 is 1.1 μM and is in agreement with the published data <sup>6</sup>.  
322 Individual data points represent mean ± SD from triplicates.

323  
324  
325  
326  
327  
328  
329  
330  
331  
332  
333  
334  
335  
336  
337  
338  
339  
340  
341  
342  
343  
344  
345  
346  
347  
348  
349  
350  
351  
352

353  
354  
355  
356  
357

A

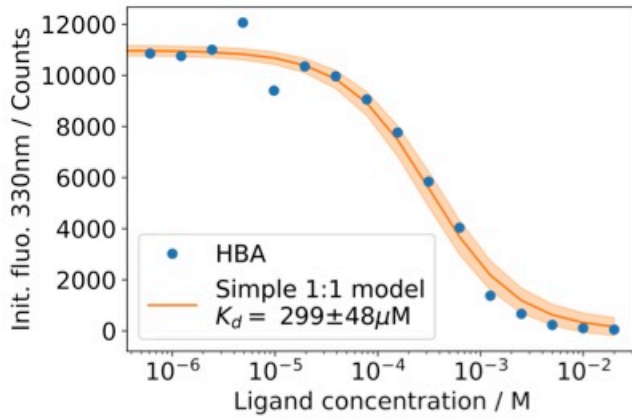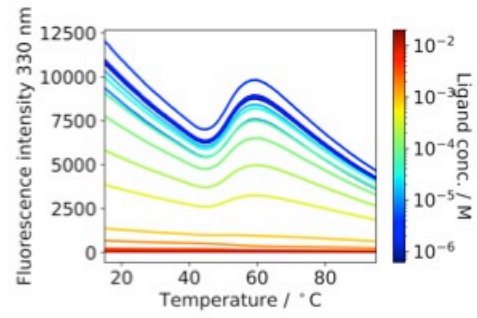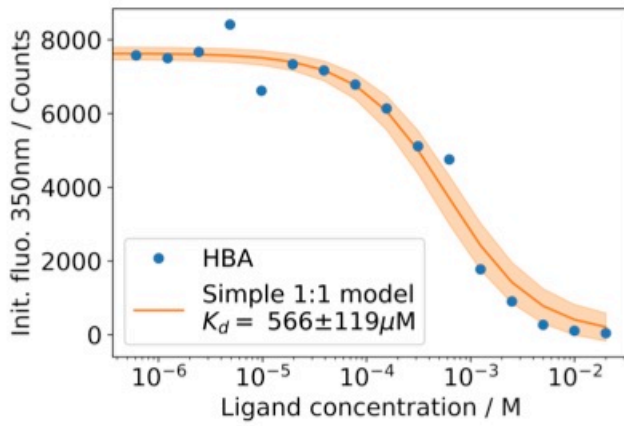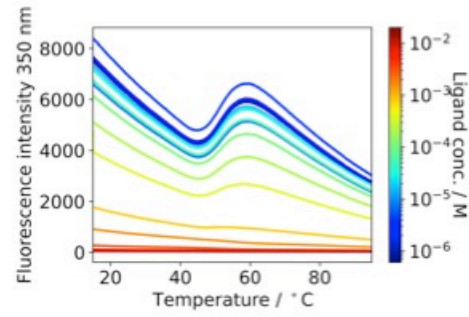

358

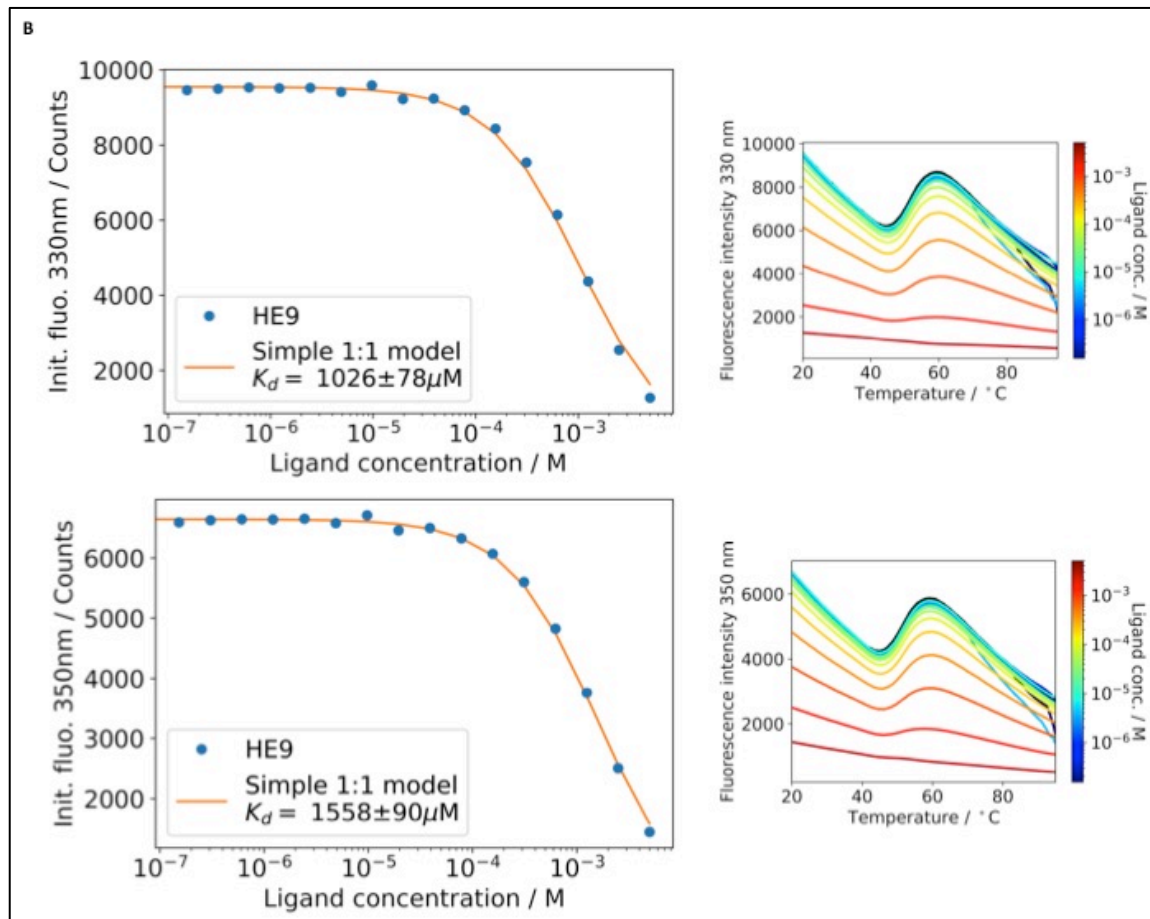

359  
 360  
 361  
 362  
 363  
 364

**Figure S15.**  
**Fluorescence titration signal (nDSF) for PLpro binding studies at 330nm and 350 nm wavelength in the presence of the inhibitors HBA (A) and HE9 (B).**

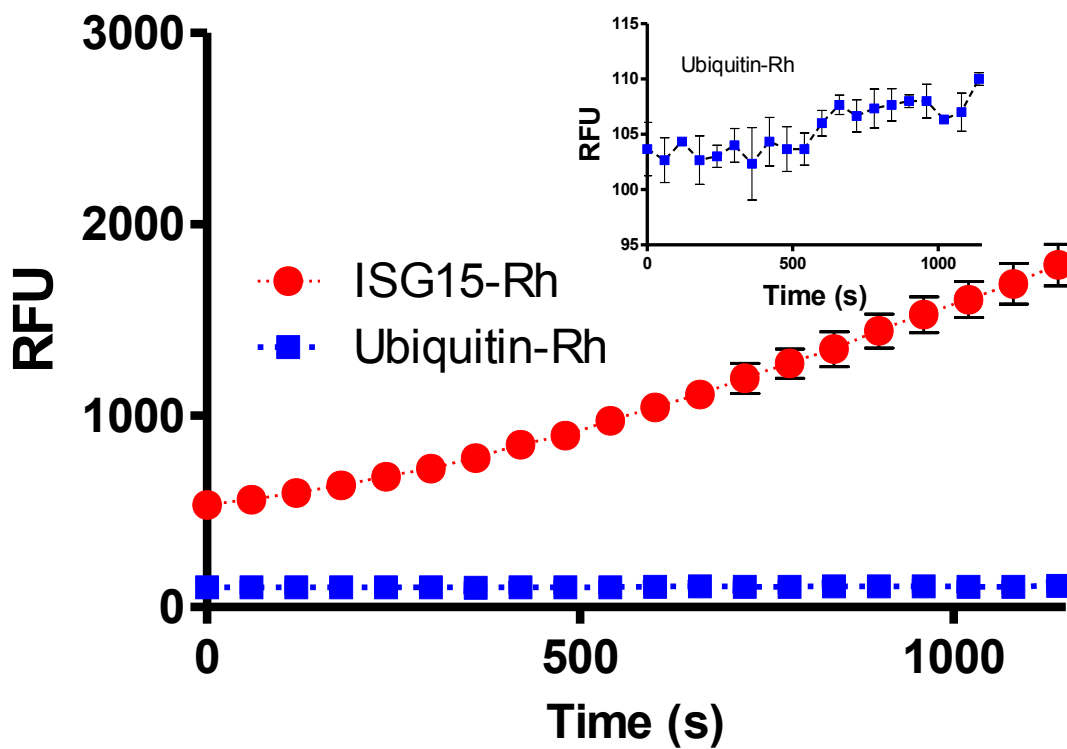

365  
 366  
 367  
 368  
 369  
 370  
 371  
 372  
 373  
 374  
 375  
 376  
 377  
 378  
 379

**Figure S16.**

**PLpro enzymatic activity utilizing ISG15-Rh and Ubiquitin-Rh as substrates**

PLpro at a concentration of 10nM and ISG15-Rh, Ubiquitin-Rh at a concentration of 100nM were used as substrates. Measured fluorescence values were blank corrected with buffer containing substrates and were measured in triplicates for 60 min with one read-out per minute. The inset shows an enlarged view of the relative fluorescence units with ubiquitin-Rh as substrate. PLpro activity can be clearly seen with ISG15-Rh as substrate and the activity is not significant applying ubiquitin-Rh as substrate.

380 **Supplementary References:**

381  
382  
383  
384  
385  
386  
387  
388  
389  
390  
391  
392  
393  
394  
395  
396  
397  
398  
399  
400

- 1 Yoshioka, T., Inokuchi, T., Fujioka, S. & Kimura, Y. Phenolic Compounds and Flavonoids as Plant Growth Regulators from Fruit and Leaf of *Vitex rotundifolia*. *Zeitschrift für Naturforschung C* **59**, 509-514, doi:doi:10.1515/znc-2004-7-810 (2004).
- 2 Linstrom, P. J., Mallard, W. G., National Institute of, S. & Technology. NIST chemistry webbook. (1997).
- 3 Wilairat, R. *et al.* Constituents of *Schisandra verruculosa*. and Their Cytotoxic Effect on Human Cancer Cell Lines. *Pharmaceutical Biology* **44**, 411-415, doi:10.1080/13880200600794105 (2006).
- 4 Robert, X. & Gouet, P. Deciphering key features in protein structures with the new ENDscript server. *Nucleic Acids Research* **42**, W320-W324, doi:10.1093/nar/gku316 (2014).
- 5 Günther, S. *et al.* X-ray screening identifies active site and allosteric inhibitors of SARS-CoV-2 main protease. *Science* **372**, 642-646 (2021).
- 6 Dražić, T., Kühn, N., Leuthold, M. M., Behnam, M. A. M. & Klein, C. D. Efficiency Improvements and Discovery of New Substrates for a SARS-CoV-2 Main Protease FRET Assay. *SLAS discovery : advancing life sciences R & D* **26**, 1189-1199, doi:10.1177/24725552211020681 (2021).
